# Supplementary material for: Application of pyrene-derived benzimidazole-linked polymers to CO2 separation under pressure and vacuum swing adsorption settings
Source: Royal Society of Chemistry journal article supplement (doi:10.1039/c4ta01281j), 2014-01-01
Supplement: c4ta01281j1.pdf [file c4ta01281j1.pdf]

# Application of Pyrene-Derived Benzimidazole-Linked Polymers to CO<sub>2</sub> Separation under Pressure and Vacuum Swing Adsorption Settings

Ali Kemal Sekizkardes, Timur İslamoğlu, Zafer Kahveci and Hani M. El-Kaderi\*

Department of Chemistry, Virginia Commonwealth University, 1001 W. Main St.,  
Richmond, VA 23284-2006, US. Fax: (804) 828-8599; Tel.: (804) 828-7505; E-mail: [helkaderi@vcu.edu](mailto:helkaderi@vcu.edu)

## Table of Content

|                   |                                                                                 |
|-------------------|---------------------------------------------------------------------------------|
| <b>Section S1</b> | <i>Characterization of BILPs</i>                                                |
|                   | <i>TGA Trace for BILPs</i>                                                      |
|                   | <i>PXRD Pattern for BILPs</i>                                                   |
|                   | <i>Scanning Electron Microscopy Imaging (SEM) for BILPs</i>                     |
|                   | <i>FT-IR Spectroscopy of Starting Materials and BILPs</i>                       |
|                   | <i>Solid-State <sup>13</sup>C CP-MAS NMR Spectrum for BILPs</i>                 |
| <b>Section S2</b> | <i>Low Pressure (0 – 1.0 bar) Gas Adsorption Studies</i>                        |
| <b>Section S3</b> | <i>Calculation of Isothermic Heats of Adsorption for BILPs</i>                  |
| <b>Section S4</b> | <i>Isotherm fittings, selectivity studies and adsorbent evaluation criteria</i> |
| <b>Section S5</b> | <i>High Pressure (1-10 bar) Gas Adsorption Studies</i>                          |

*Section 1: Characterization of BILPs*

**Figure S1:** TGA traces of BILP-11, BILP-12, BILP-13.

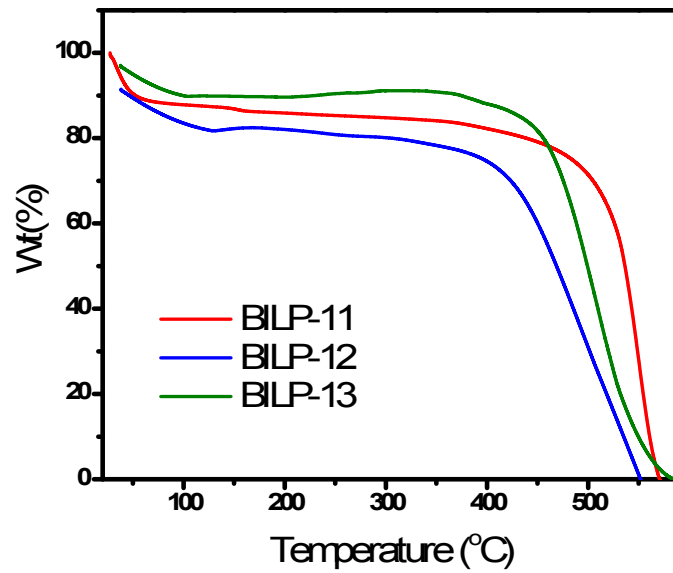

**Figure S2:** XRD-patterns for BILP-11, BILP-12, BILP-13, indicating the amorphous characteristics of polymers.

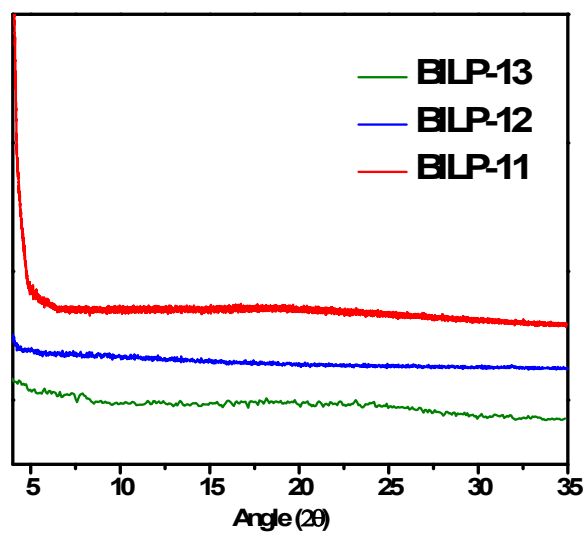

**Figure S3:** SEM images of BILP-11, BILP-12, BILP-13.

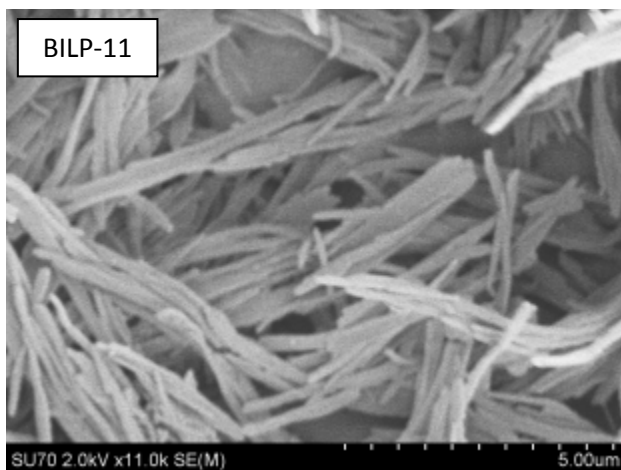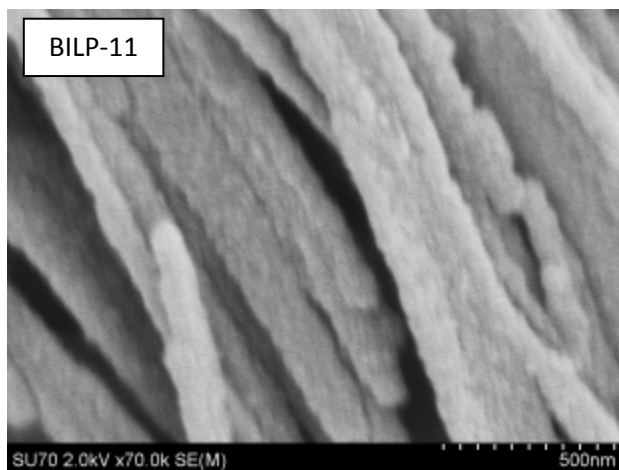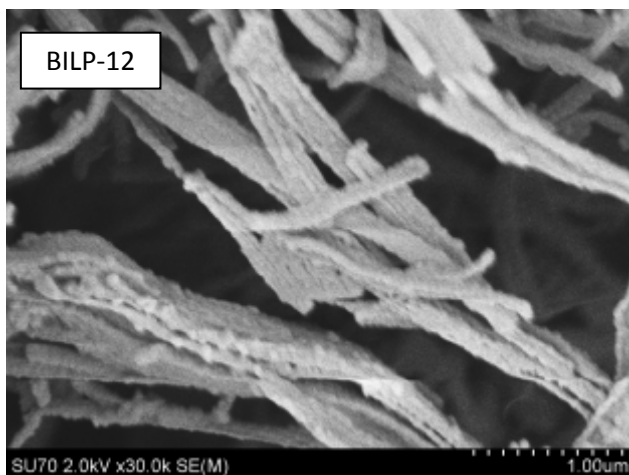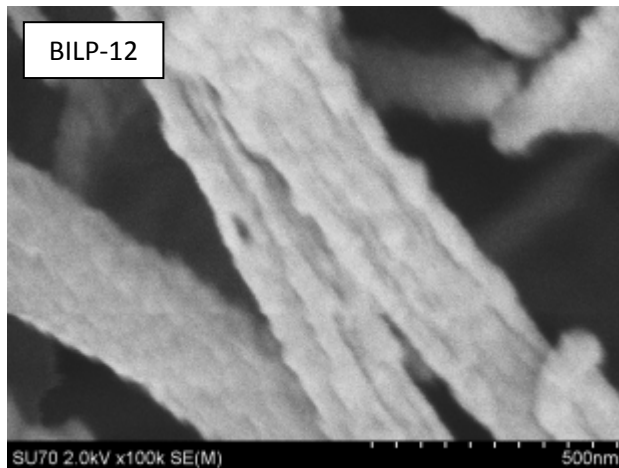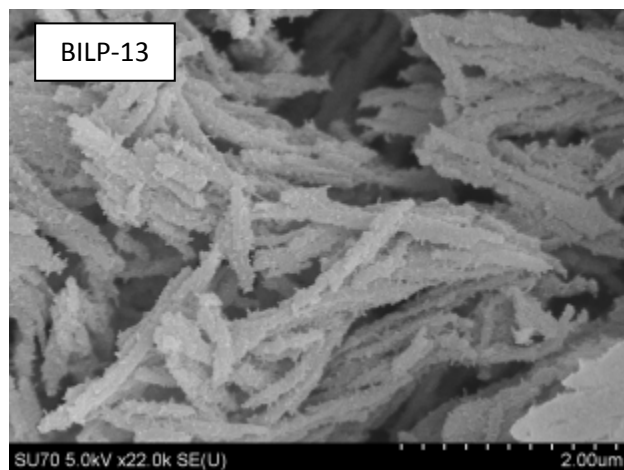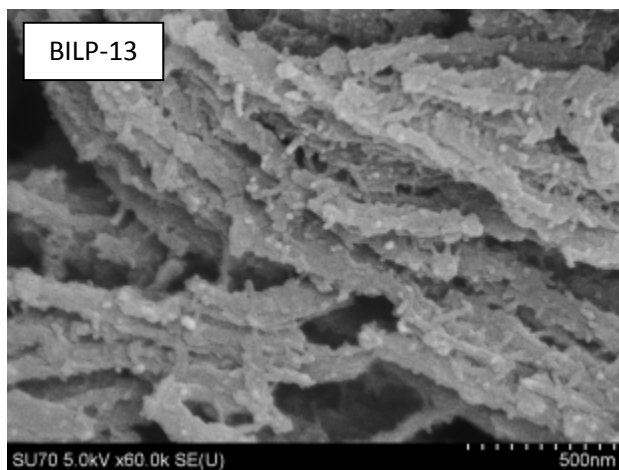

**Figure S4:** FT-IR spectra of BILP-11, BILP-12, BILP-13 and their starting building units. Lower panel is an expanded region from 500 to 2000  $\text{cm}^{-1}$ .

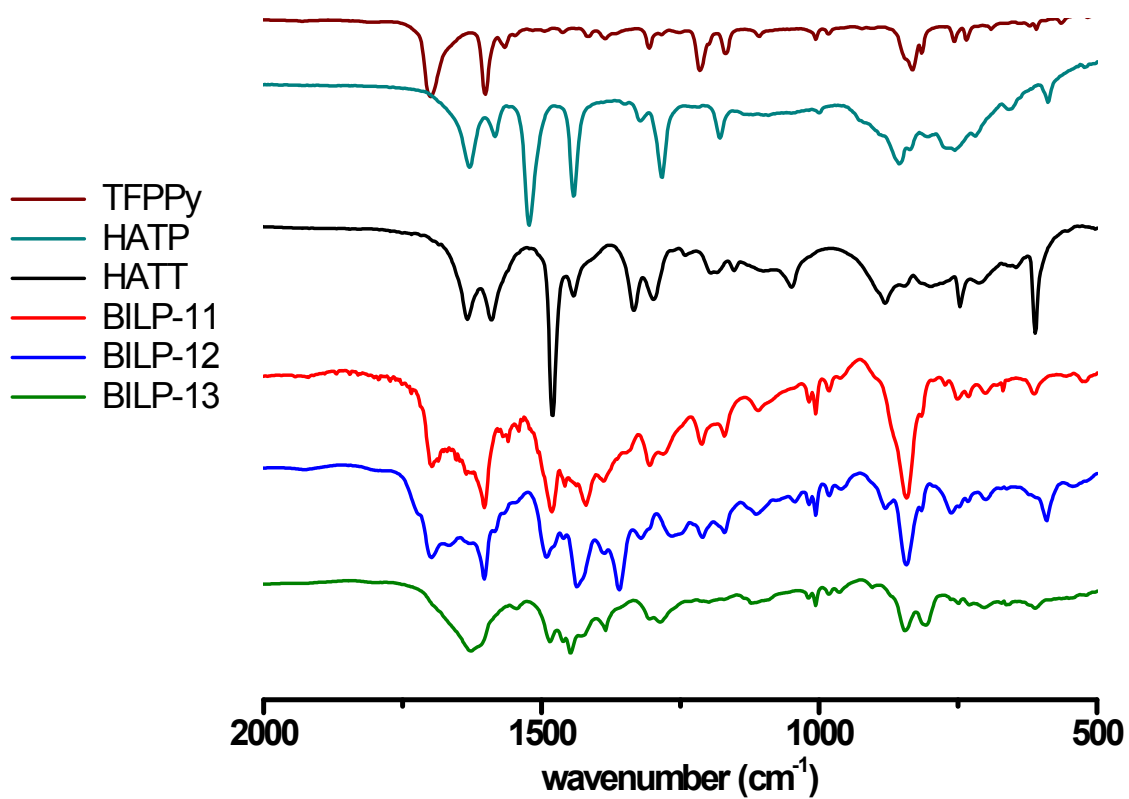

**Figure S5:** FT-IR spectra (500-4000  $\text{cm}^{-1}$ ) of starting materials and polymers.

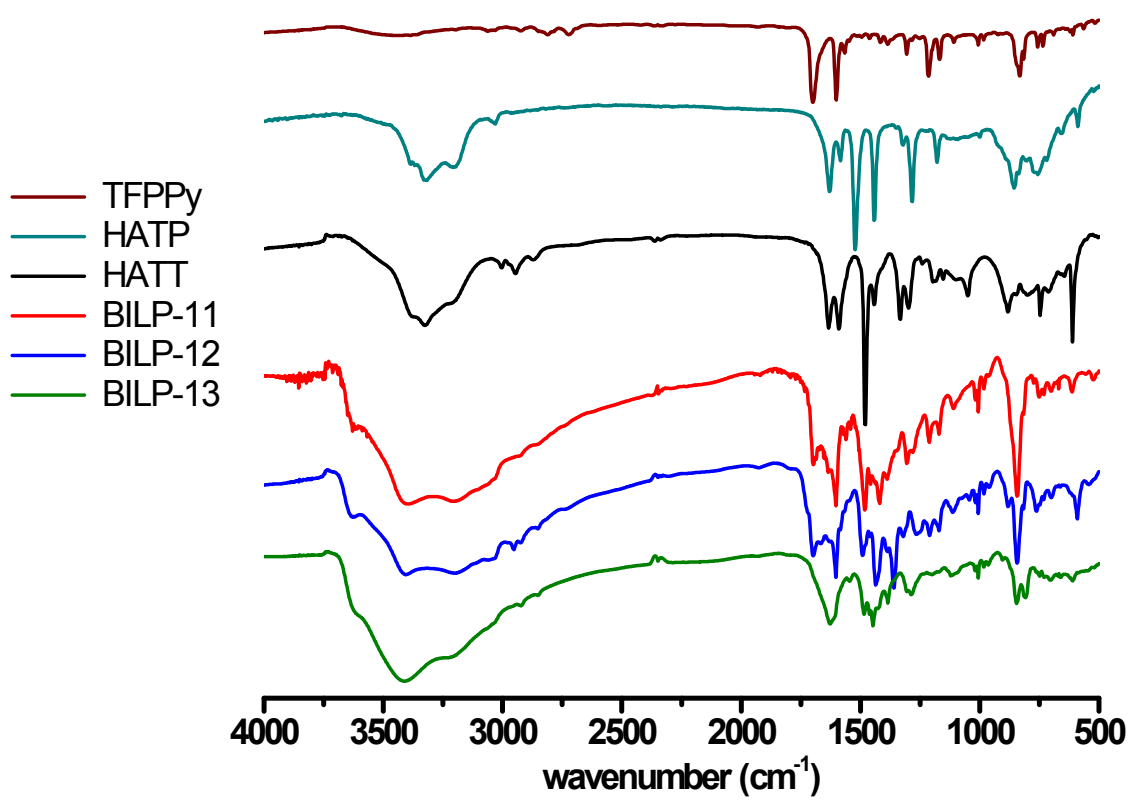

**Figure S6:** Solid state  $^{13}\text{C}$  CP-MAS NMR spectra of BILP-11, BILP-12 and BILP-13.

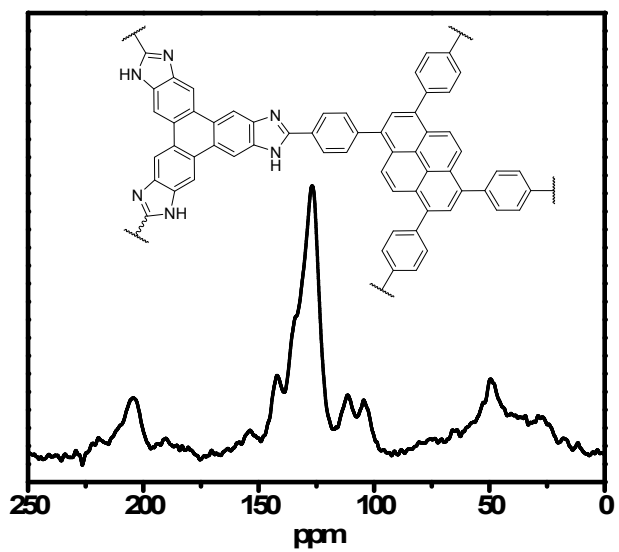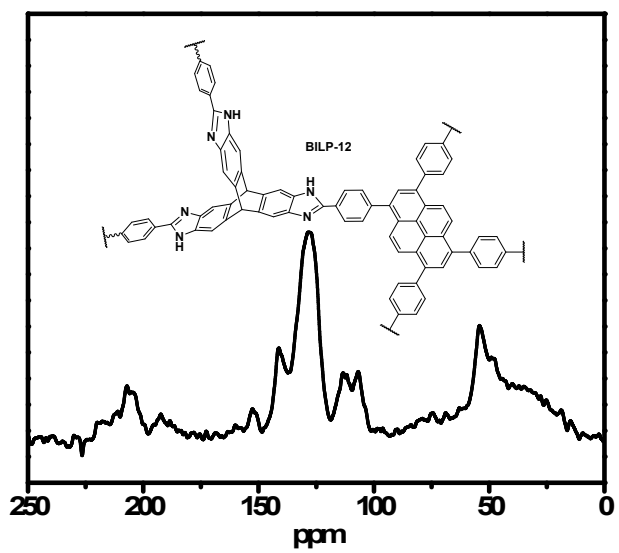

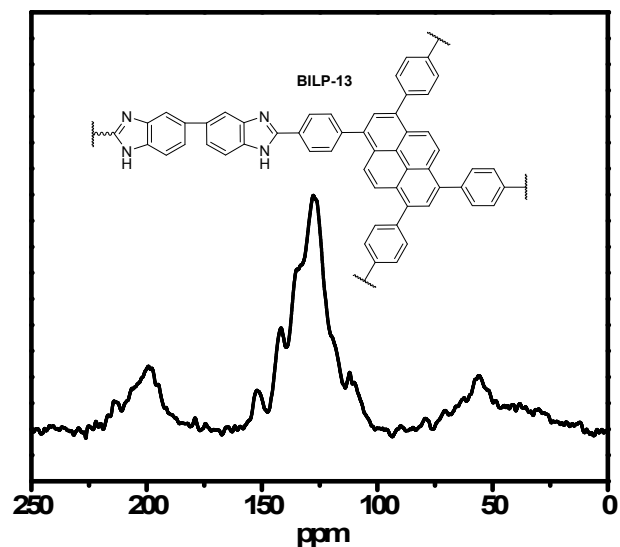

**Table S1.** Assignments of the  $^{13}\text{C}$  CP-MAS NMR peaks for BILPs.

| Peaks (ppm)    | Peaks (ppm)    | Peaks (ppm)    | Assignments/Comments                                                                                                                         |
|----------------|----------------|----------------|----------------------------------------------------------------------------------------------------------------------------------------------|
| <b>BILP-11</b> | <b>BILP-12</b> | <b>BILP-13</b> |                                                                                                                                              |
|                | 54             |                | Triptycene aliphatic CH.                                                                                                                     |
| 104            |                |                | Triphenylene aromatic CH(1) which is observed at 107 ppm in HATP. <sup>1</sup> ( $d_6$ -DMSO)                                                |
| 107            |                |                | Triptycene aromatic CH(2). The peak is observed at 111 ppm in HATT. <sup>2</sup> ( $d_6$ -DMSO)                                              |
|                | 111            |                | Triphenylene aromatic C(2). The peak is observed at 121 ppm in HATT. <sup>2</sup> ( $d_6$ -DMSO)                                             |
| 113            |                |                | Triptycene aromatic C(3). The peak is observed at 131 ppm in HATT. <sup>2</sup> ( $d_6$ -DMSO).                                              |
| 153            | 152            | 152            | Benzimidazole ring C in C=N. There is no peak was observed at around 160 for imine C=N showing formation of benzimidazole ring. <sup>3</sup> |



## **Section 2: Low-Pressure (0 – 1.0 bar) Gas Adsorption Measurements.**

**Activation of polymers for gas adsorption measurements:** A sample was loaded into a 9 mm large bulb cell (from Quantachrome) of known weight and then hooked up to MasterPrep. The sample was degassed at 120 °C for 12 hours. The degassed sample was weighed precisely and then transferred back to the analyzer. The temperatures for adsorption measurements was controlled by using refrigerated bath of liquid nitrogen (77 K) or liquid argon (87 K), and temperature controlled water bath (273 K and 298 K). Adsorption measurements were performed on an Autosorb-1 C (Quantachrome) volumetric analyzer using adsorbates of UHP grade.

**Figure S7:** Experimental Ar adsorption isotherms for BILP-11 (orange circles), BILP-12 (blue circles) and BILP-13 (red circles) measured at 87 K. The calculated NLDFT isotherm is overlaid as open circle. Note that a fitting error of  $< 1\%$  indicates the validity of using this method for assessing the porosity of BILPs. The fitting error is indicated.

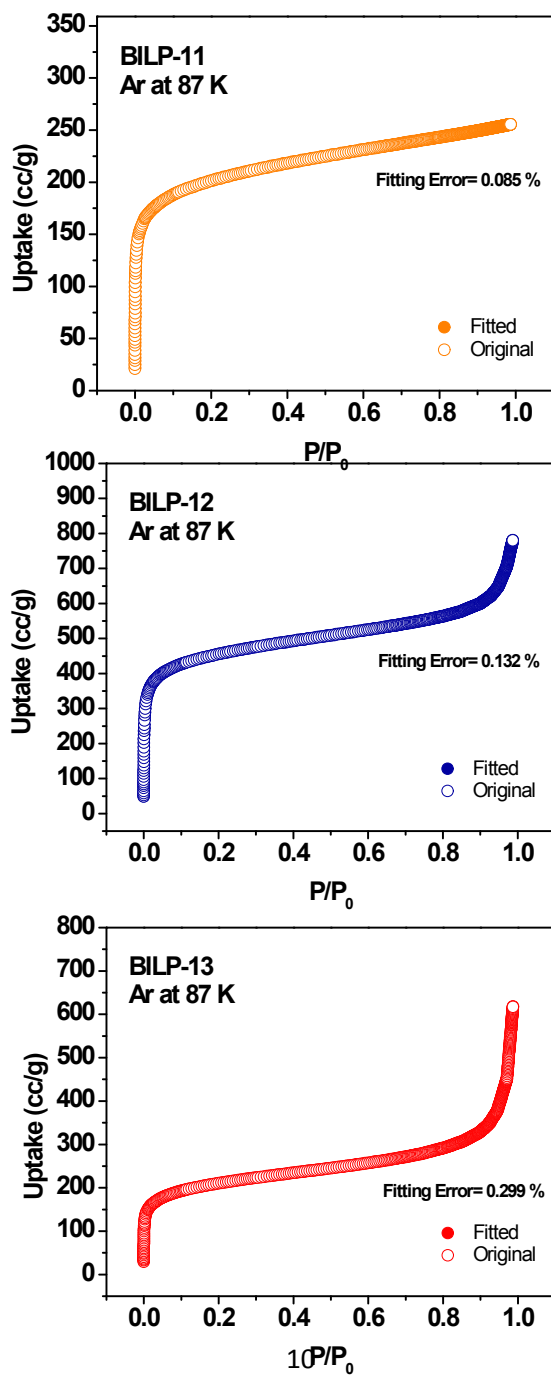

**Figure S8:** Pore Size Distribution of BILP-11, BILP-12, BILP-13.

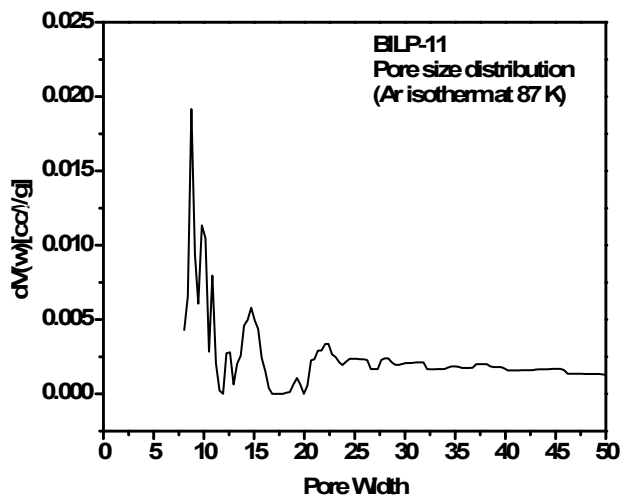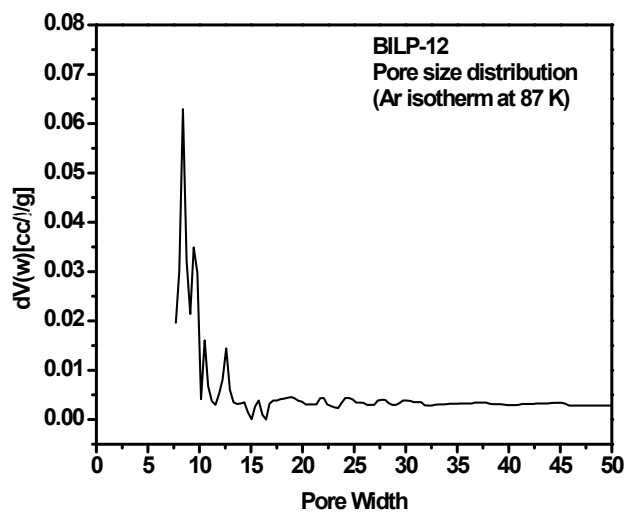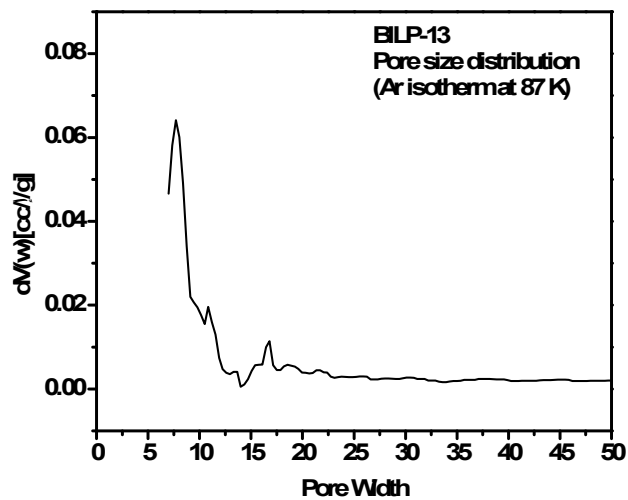

**Figure S 9.** Plot of the term  $V(1 - P/P_0)$  vs.  $P/P_0$  for BILP-11. Only the range below  $P/P_0 = 0.10$  satisfies the first consistency criterion for applying the BET theory. Inset: Plot of the linear region for the BET equation.

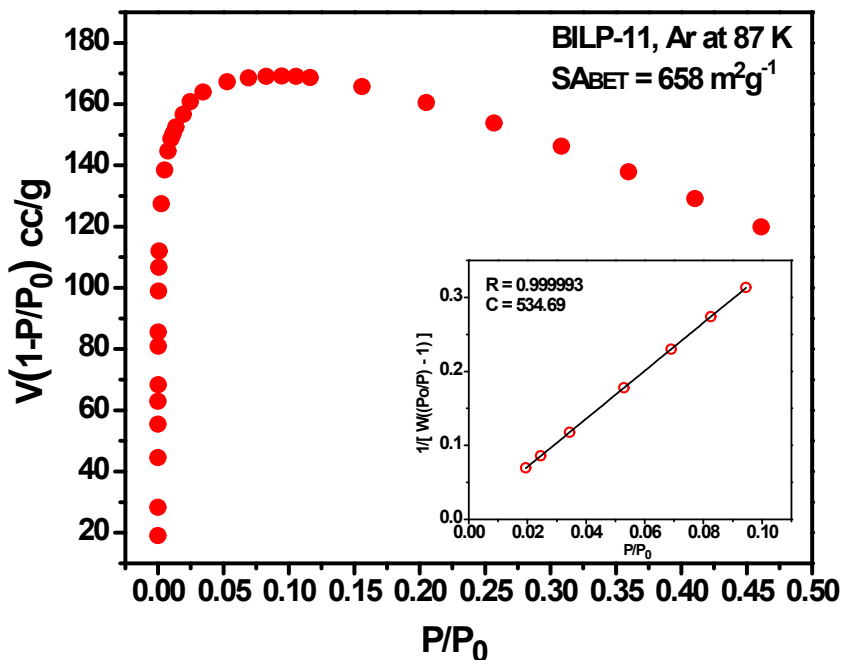

**Figure S 10.** Plot of the term  $V(1 - P/P_0)$  vs.  $P/P_0$  for BILP-12. Only the range below  $P/P_0 = 0.09$  satisfies the first consistency criterion for applying the BET theory. Inset: Plot of the linear region for the BET equation.

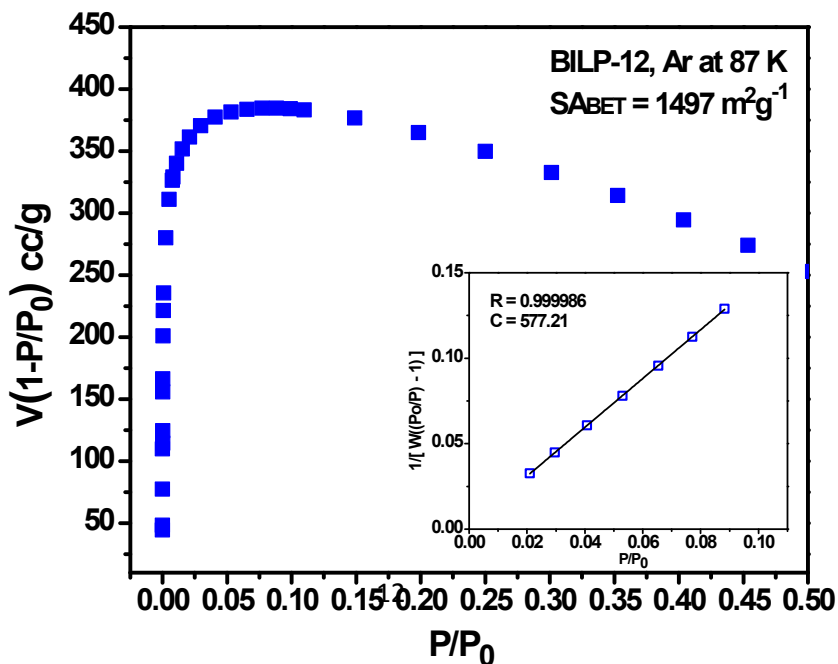

**Figure S 11.** Plot of the term  $V(1 - P/P_0)$  vs.  $P/P_0$  for BILP-13. Only the range below  $P/P_0 = 0.11$  satisfies the first consistency criterion for applying the BET theory. Inset: Plot of the linear region for the BET equation.

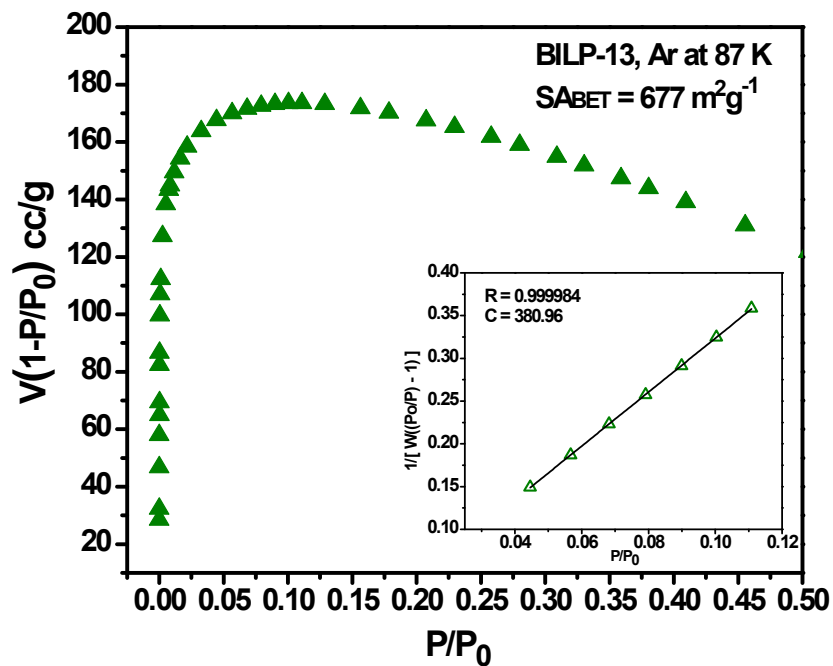

**Figure S12:** Gas uptake isotherms for BILP-11 (orange circles), BILP-12 (blue pentagons) and BILP-13 (red triangle) at 273 and 298 K.

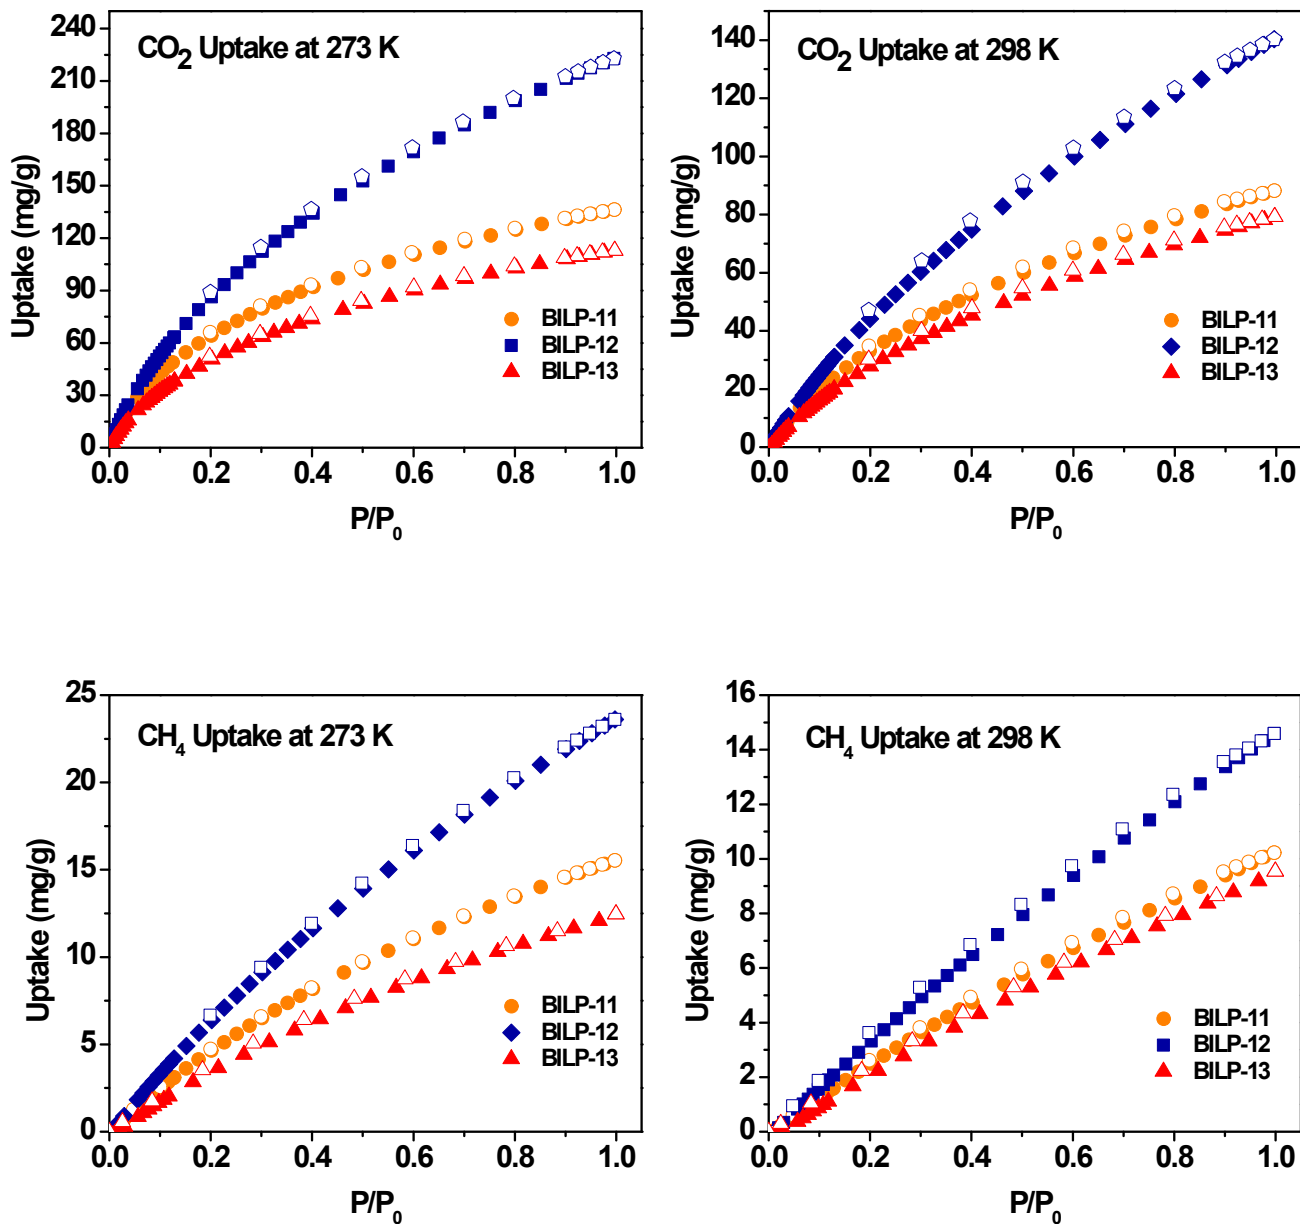

### Section 3: Calculation of Isothermic heats of adsorption for BILPs

We have fitted the pure gas isotherms collected at 237 and 298 K with both virial-type and Langmuir-Freundlich equation. In both cases Clausius-Clapeyron equation employed in order to calculate isothermic heat of adsorptions of BILPs.

$$Q_{st} = RT^2 \left( \frac{\partial \ln p}{\partial T} \right)_n$$

where  $T$  is the temperature,  $R$  is the universal gas constant and  $p$  is the pressure for given quantity of gas adsorbed ( $n$ ). Pressure for a given  $n$  calculated from fitted isotherms.

The virial equation can be written in the form of

$$\ln p = \ln n + \frac{1}{T} \sum_{i=0}^M a_i n^i + \sum_{i=0}^N b_i n^i$$

where  $n$  is the amount adsorbed in mmol g<sup>-1</sup>,  $p$  is the pressure in Torr,  $T$  is the temperature,  $a_i$  and  $b_i$  are temperature independent empirical parameters, and  $M$  and  $N$  determine the number of terms required to adequately describe the isotherm.

By applying Clausius-Clapeyron equation to virial equation,  $Q_{st}$  can be calculated according to following equation as a function of loading:

$$Q_{st} = -R \sum_{i=0}^M a_i n^i$$

where  $R$  is the universal gas constant (8.314 J K<sup>-1</sup> mol<sup>-1</sup>).

Zero-coverage (loading independent) isosteric heats of adsorption is given by

$$Q_{st} = -R a_0$$

Langmuir-Freundlich isotherm model was also used to describe single component gas uptakes measured at 273 and 298 K. Fitting parameters obtained were then used to calculate the pressures required for the same loadings ( $n$ ) at 273 and 298 K, then Clausius-Clapeyron equation were applied in order to calculate isosteric heats of adsorption.<sup>4</sup> Langmuir-Freundlich equation and fitting parameters are given in the next section.



**Figure S13.** Experimental data (symbol) and corresponding fittings (solid line) of CO<sub>2</sub> adsorption isotherms in BILP-11 at 273 and 298 K. Fitted curves are obtained by the virial-type expansion.

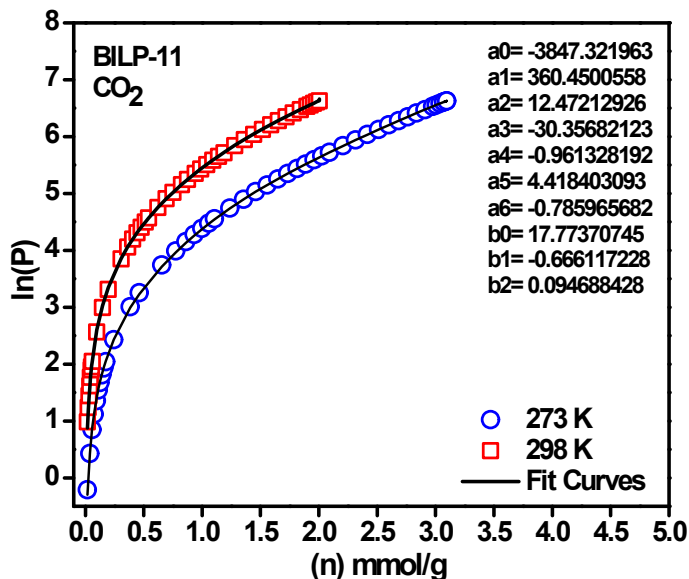

**Figure S14.** Experimental data (symbol) and corresponding fittings (solid line) of CO<sub>2</sub> adsorption isotherms in BILP-12 at 273 and 298 K. Fitted curves are obtained by the virial-type expansion.

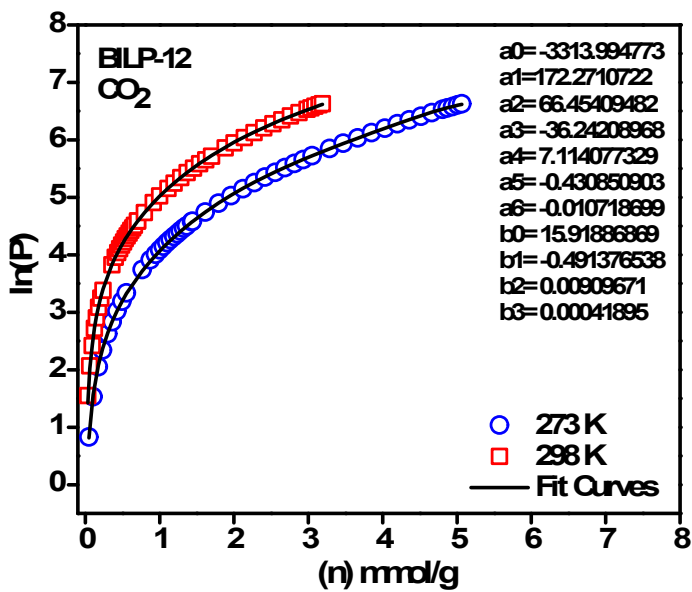

**Figure S15.** Experimental data (symbol) and corresponding fittings (solid line) of CO<sub>2</sub> adsorption isotherms in BILP-13 at 273 and 298 K. Fitted curves are obtained by the virial-type expansion.

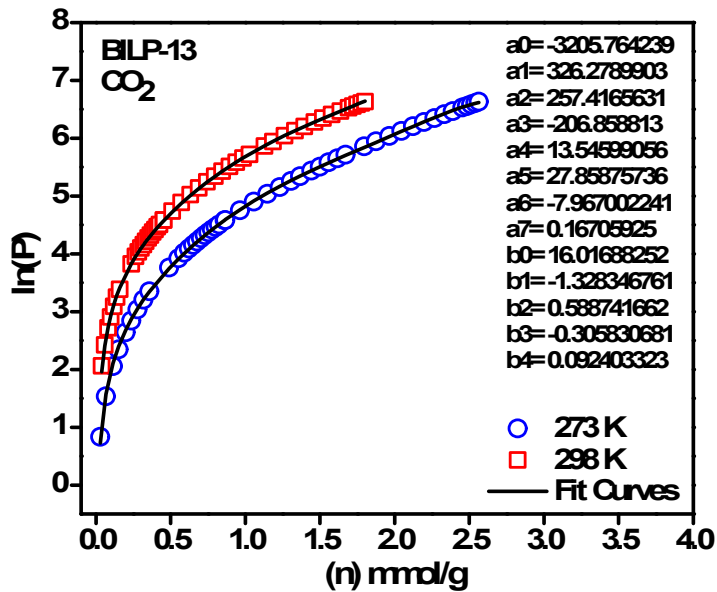

**Figure S16.** Experimental data (symbol) and corresponding fittings (solid line) of CH<sub>4</sub> adsorption isotherms in BILP-11 at 273 and 298 K. Fitted curves are obtained by the virial-type expansion.

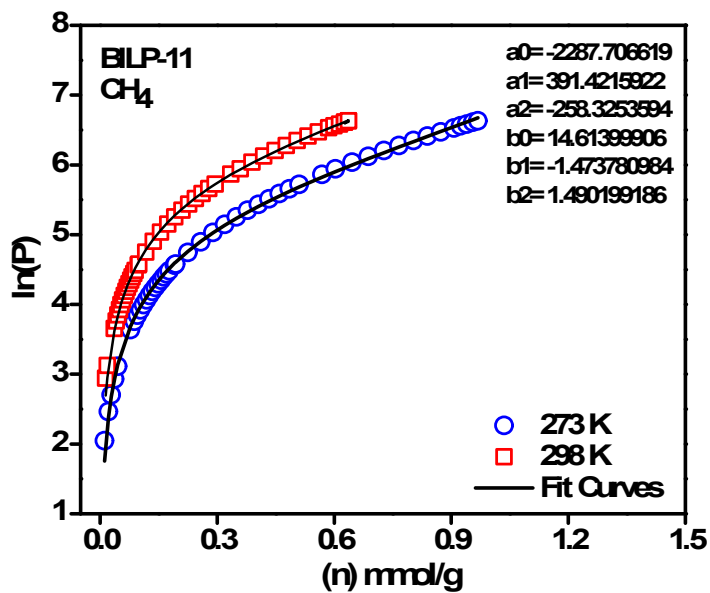

**Figure S17.** Experimental data (symbol) and corresponding fittings (solid line) of CH<sub>4</sub> adsorption isotherms in BILP-12 at 273 and 298 K. Fitted curves are obtained by the virial-type expansion.

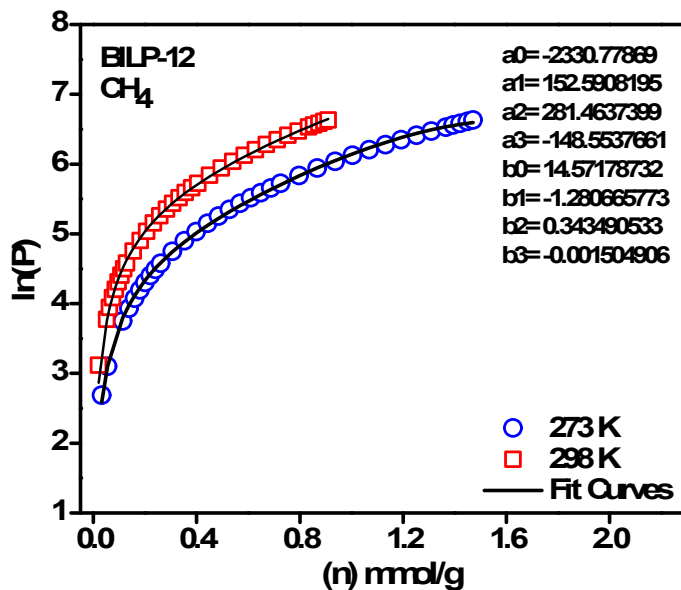

**Figure S18.** Experimental data (symbol) and corresponding fittings (solid line) of CH<sub>4</sub> adsorption isotherms in BILP-13 at 273 and 298 K. Fitted curves are obtained by the virial-type expansion.

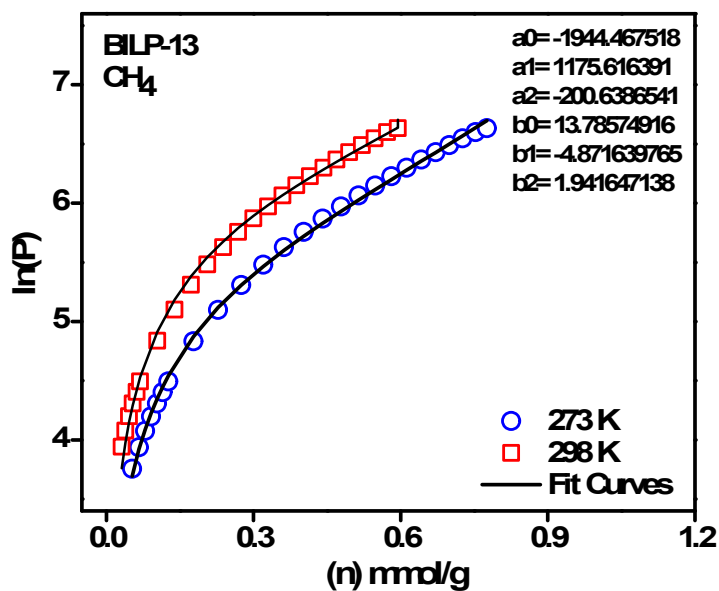

**Figure S19.** Isothermic heats of adsorption of methane in BILP-11, BILP-12, and BILP-13 calculated using viral-type isotherm fitting.

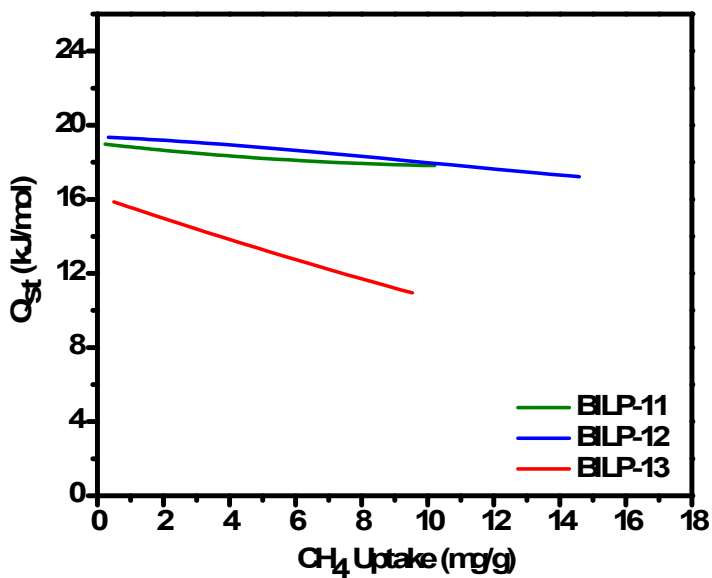

**Figure S20.** Isothermic heats of adsorption of methane in BILP-11, BILP-12, and BILP-13 calculated Langmuir-Freundlich isotherm fitting.

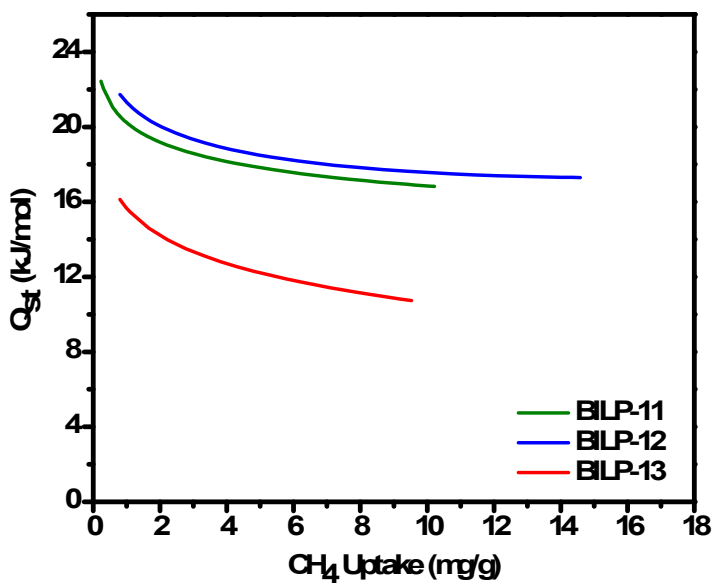

#### Section 4: Isotherm fittings, selectivity studies and adsorbent evaluation criteria.

The pure component isotherms of CO<sub>2</sub> measured at 273 and 298 K were fitted with the dual-site Langmuir-Freundlich (DSLFL) model

$$q = q_A + q_B = q_{sat,A} \frac{b_A p^{\alpha_A}}{1 + b_A p^{\alpha_A}} + q_{sat,B} \frac{b_B p^{\alpha_B}}{1 + b_B p^{\alpha_B}}$$

where,  $q$  is molar loading of adsorbate (mmol g<sup>-1</sup>),  $q_{sat}$  is saturation capacity (mmol g<sup>-1</sup>),  $b$  is Langmuir-Freundlich parameter (bar<sup>- $\alpha$</sup> ),  $p$  is bulk gas phase pressure (bar),  $\alpha$  is the Langmuir-Freundlich exponent (dimensionless) subscripts  $A$  and  $B$  refers to site  $A$  and site  $B$ , respectively.

Since the pure component isotherms of CH<sub>4</sub> and N<sub>2</sub> do not show any inflection characteristic they were fitted with the single-site Langmuir-Freundlich (SSLFL) model.

$$q = q_{sat,A} \frac{b_A p^{\alpha_A}}{1 + b_A p^{\alpha_A}}$$

Pure-component isotherm fitting parameters were then used for calculating Ideal Adsorbed Solution Theory (IAST) binary-gas adsorption selectivities,  $S_{ads}$ , defined as

$$S_{ads} = \frac{x_1/x_2}{p_1/p_2}$$

where  $x_i$  is the mole fraction of component  $i$  in the adsorbed phase and  $p_i$  is the mole fraction of component  $i$  in the bulk.<sup>5</sup>

$x_i$  values were then used for calculating total amount adsorbed under mixture conditions according to following equation

$$\frac{1}{n_t} = \sum_{i=1}^N \left[ \frac{x_i}{n_i^0} \right]$$

where  $n_t$  is the total number of adsorbed moles of gas per unit mass of adsorbent and  $n_i^0$  is the number of moles of component  $i$  in the adsorbed phase per unit mass of adsorbent at temperature  $T$  in the absence of competing component.<sup>5</sup>

The adsorption amount for the component  $i$  ( $n_i^{ads}$ ) in the binary mixture adsorption is calculated employing the following equation:

$$n_i^{ads} = n_t x_i$$

Using the sorbent evaluation criteria one can easily evaluate the material for possible pressure swing adsorption (PSA) and vacuum swing adsorption (VSA) applications. Recent cases have been used in literature are the following,<sup>6 7</sup>

1. Natural gas purification using PSA (CO<sub>2</sub>/CH<sub>4</sub> : 10/90, p<sup>ads</sup> = 5 bar, p<sup>des</sup> = 1 bar)
2. Landfill gas separation using PSA (CO<sub>2</sub>/CH<sub>4</sub> : 50/50, p<sup>ads</sup> = 5 bar, p<sup>des</sup> = 1 bar)
3. Landfill gas separation using VSA (CO<sub>2</sub>/CH<sub>4</sub> : 50/50, p<sup>ads</sup> = 1 bar, p<sup>des</sup> = 0.1 bar)
4. Flue gas separation using VSA (CO<sub>2</sub>/N<sub>2</sub> : 10/90, p<sup>ads</sup> = 1 bar, p<sup>des</sup> = 0.1 bar)

Figure S21: CO<sub>2</sub>, CH<sub>4</sub> and N<sub>2</sub> uptakes of BILP-11, BILP-12 and BILP-13 at 273 K and 298 K.

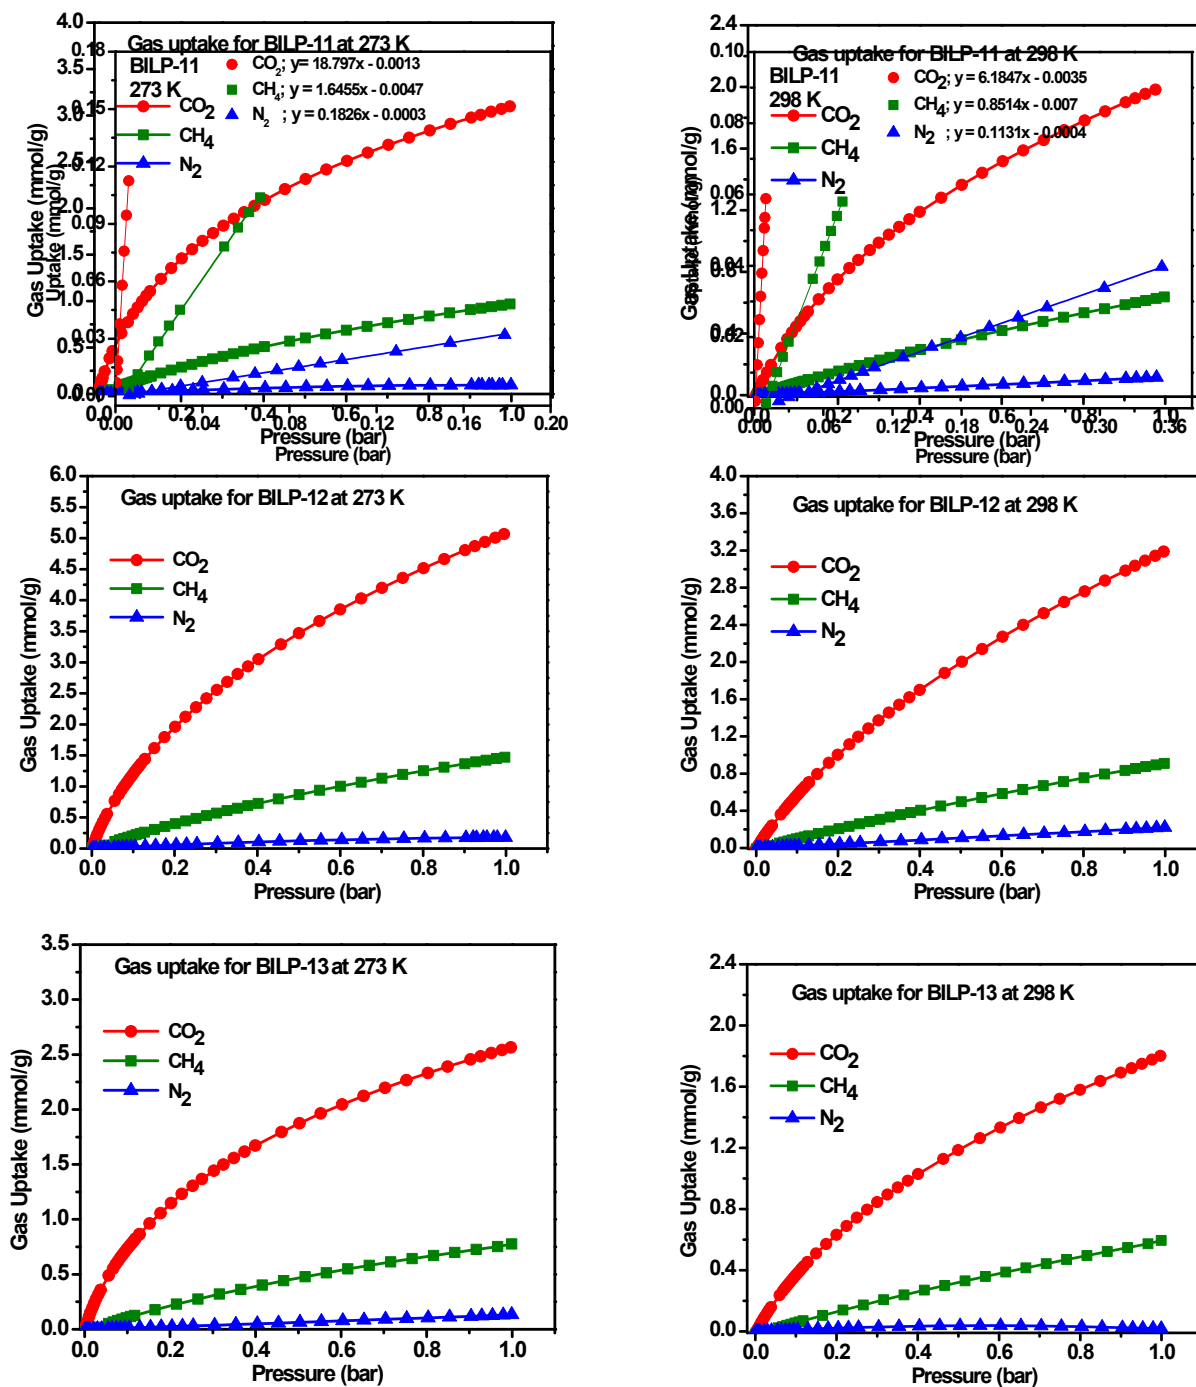

Figure S22: Gas uptake selectivity studies for BILP-11, BILP-12 and BILP-13 at 273 and 298 K (CO<sub>2</sub> over CH<sub>4</sub> and N<sub>2</sub>).

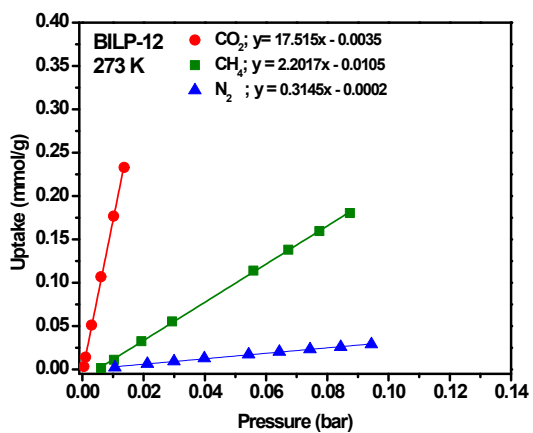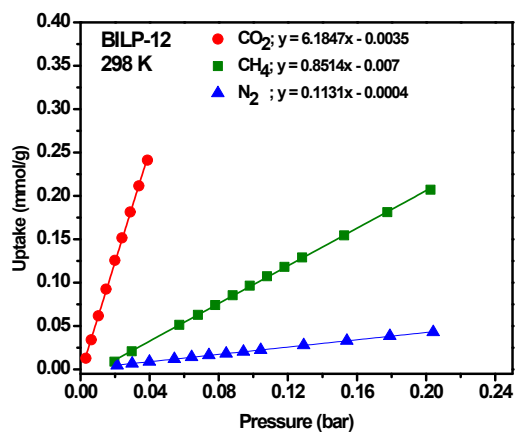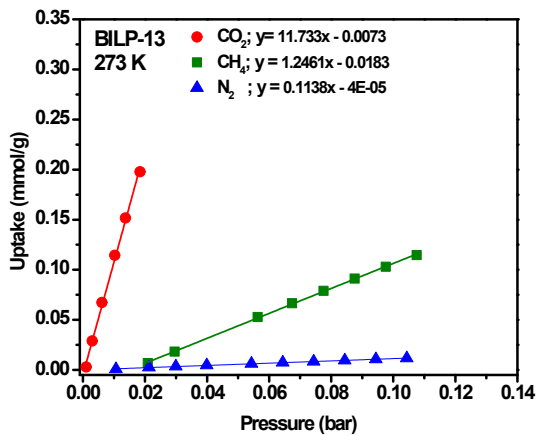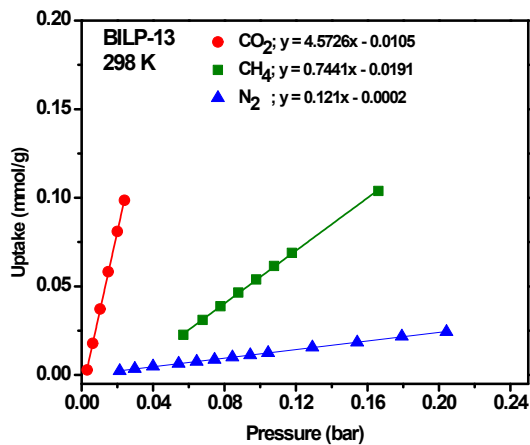



**Table S2.** Langmuir-Freundlich fitting parameters of CO<sub>2</sub>, CH<sub>4</sub>, and N<sub>2</sub> adsorption isotherms in BILP-11 at 298 K and low pressures (0-1 bar).

|                 | $q_{sat,A}$<br>(mmol/g) | $b_A$<br>(bar <sup>-<math>\alpha</math>)</sup> | $\alpha_A$<br>dimensionless | $q_{sat,B}$<br>(mmol/g) | $b_B$<br>(bar <sup>-<math>\alpha</math>)</sup> | $\alpha_B$<br>dimensionless | Reduced<br>$\chi^2$ | Adj.<br>$R^2$ |
|-----------------|-------------------------|------------------------------------------------|-----------------------------|-------------------------|------------------------------------------------|-----------------------------|---------------------|---------------|
| CO <sub>2</sub> | 4.63186                 | 0.38932                                        | 0.99595                     | 0.86275                 | 4.58749                                        | 0.98666                     | 1.86E-06            | 1             |
| CH <sub>4</sub> | 2.39111                 | 0.36226                                        | 1.03824                     |                         |                                                |                             | 2.14E-06            | 0.99995       |
| N <sub>2</sub>  | 7.00487                 | 0.01702                                        | 1.04926                     |                         |                                                |                             | 1.67E-07            | 0.9999        |

**Figure S23.** Experimental data and corresponding fittings of CO<sub>2</sub>, CH<sub>4</sub>, and N<sub>2</sub> adsorption isotherms in BILP-11 at 298 K and low pressures (0-1 bar).

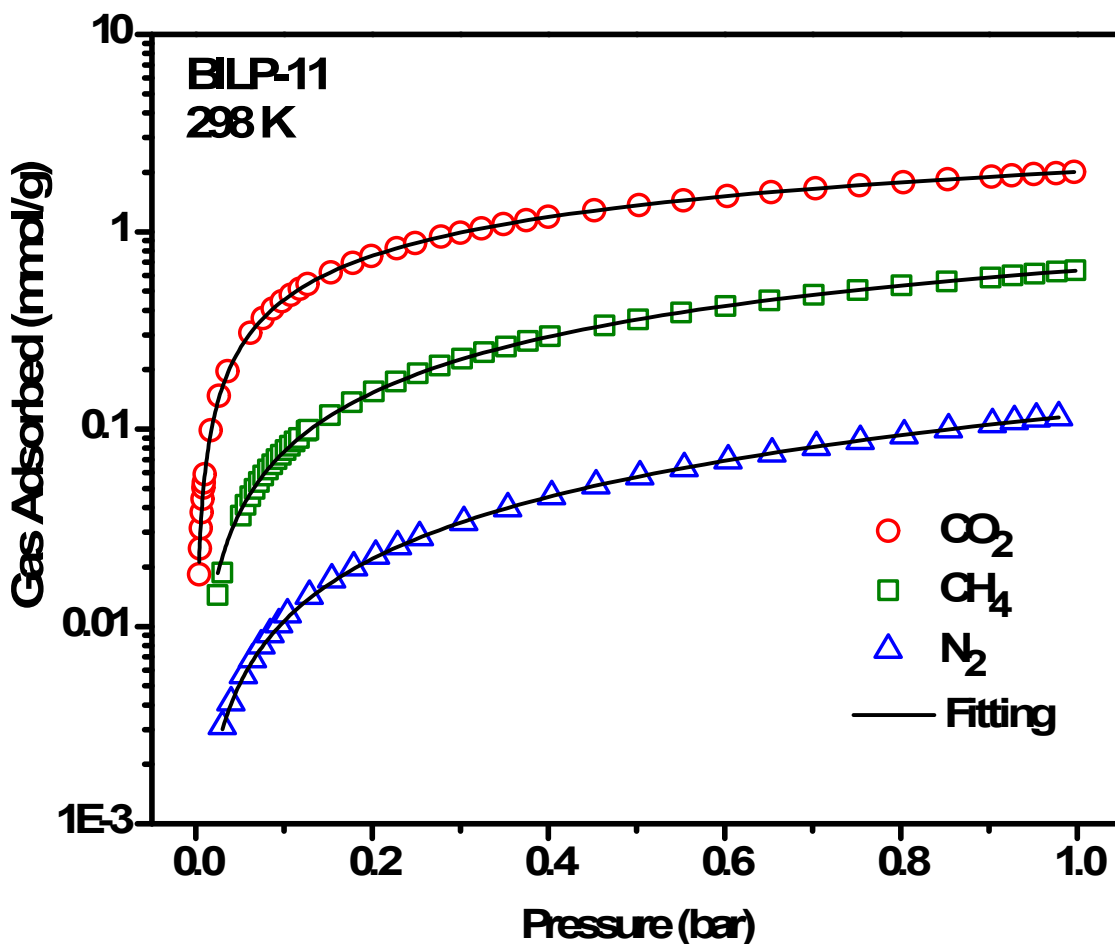

**Table S3.** Langmuir-Freundlich fitting parameters of CO<sub>2</sub>, CH<sub>4</sub>, and N<sub>2</sub> adsorption isotherms in BILP-12 at 298 K low pressures (0-1 bar).

|                 | $q_{sat,A}$<br>(mmol/g) | $b_A$<br>(bar <sup>-α</sup> ) | $\alpha_A$<br>dimensionless | $q_{sat,B}$<br>(mmol/g) | $b_B$<br>(bar <sup>-α</sup> ) | $\alpha_B$<br>dimensionless | Reduced<br>$\chi^2$ | Adj.<br>$R^2$ |
|-----------------|-------------------------|-------------------------------|-----------------------------|-------------------------|-------------------------------|-----------------------------|---------------------|---------------|
| CO <sub>2</sub> | 11.53246                | 0.24064                       | 1.03760                     | 1.22272                 | 3.59695                       | 1.01274                     | 1.86E-06            | 1             |
| CH <sub>4</sub> | 3.84089                 | 0.30965                       | 1.06675                     |                         |                               |                             | 2.14E-06            | 0.99995       |
| N <sub>2</sub>  | 12.48505                | 0.01789                       | 1.03264                     |                         |                               |                             | 1.67E-07            | 0.9999        |

**Figure S24.** Experimental data and corresponding fittings of CO<sub>2</sub>, CH<sub>4</sub>, and N<sub>2</sub> adsorption isotherms in BILP-12 at 298 K and low pressures (0-1 bar).

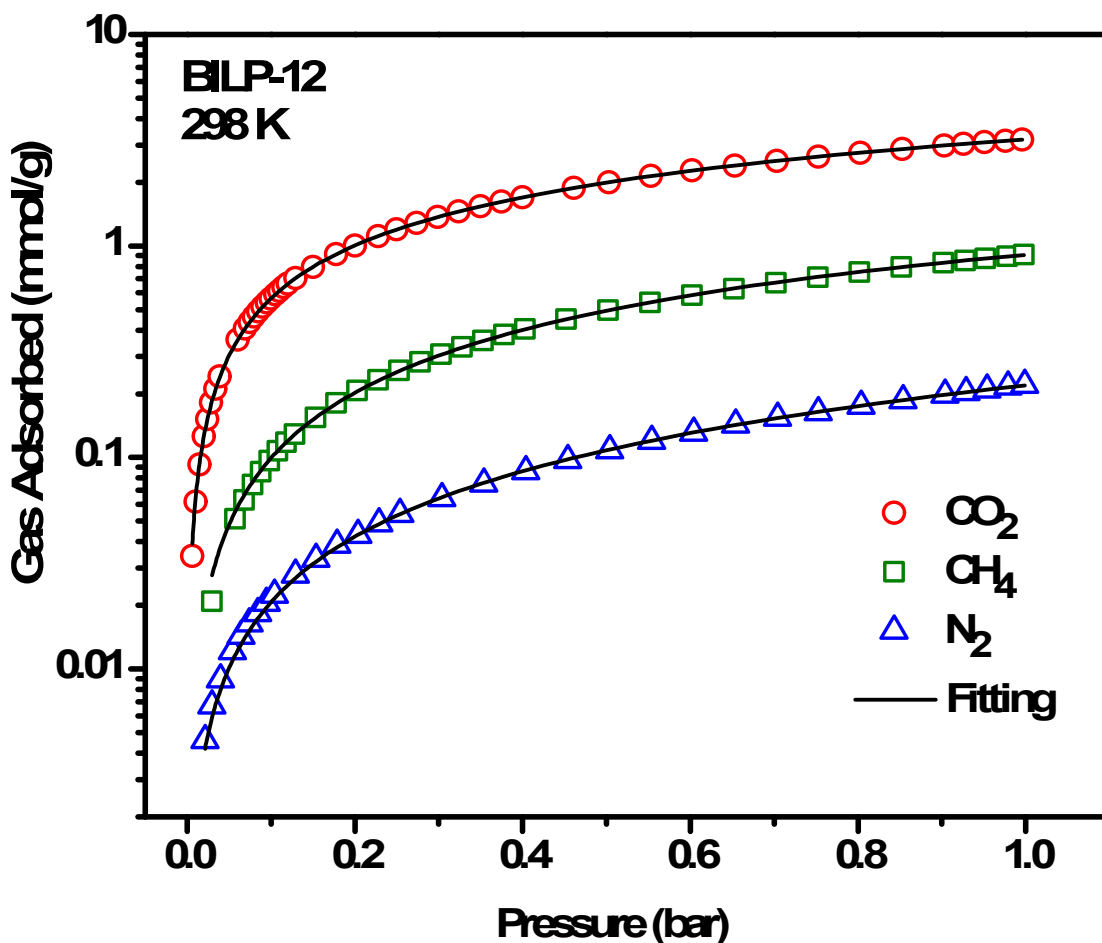

**Table S4.** Langmuir-Freundlich fitting parameters of CO<sub>2</sub>, CH<sub>4</sub>, and N<sub>2</sub> adsorption isotherms in BILP-13 at 298 K low pressures (0-1 bar).

|                 | $q_{sat,A}$<br>(mmol/g) | $b_A$<br>(bar <sup>-<math>\alpha</math>)</sup> | $\alpha_A$<br>dimensionless | $q_{sat,B}$<br>(mmol/g) | $b_B$<br>(bar <sup>-<math>\alpha</math>)</sup> | $\alpha_B$<br>dimensionless | Reduced<br>$\chi^2$ | Adj.<br>$R^2$ |
|-----------------|-------------------------|------------------------------------------------|-----------------------------|-------------------------|------------------------------------------------|-----------------------------|---------------------|---------------|
| CO <sub>2</sub> | 4.31374                 | 0.41225                                        | 1.05511                     | 0.62258                 | 6.56056                                        | 1.09024                     | 3.22E-06            | 0.99999       |
| CH <sub>4</sub> | 1.73943                 | 0.50917                                        | 1.17534                     |                         |                                                |                             | 1.29E-05            | 0.99966       |
| N <sub>2</sub>  | 15.47574                | 0.00859                                        | 1.06806                     |                         |                                                |                             | 3.55E-07            | 0.99984       |

**Figure S25.** Experimental data and corresponding fittings of CO<sub>2</sub>, CH<sub>4</sub>, and N<sub>2</sub> adsorption isotherms in BILP-13 at 298 K and low pressures (0-1 bar).

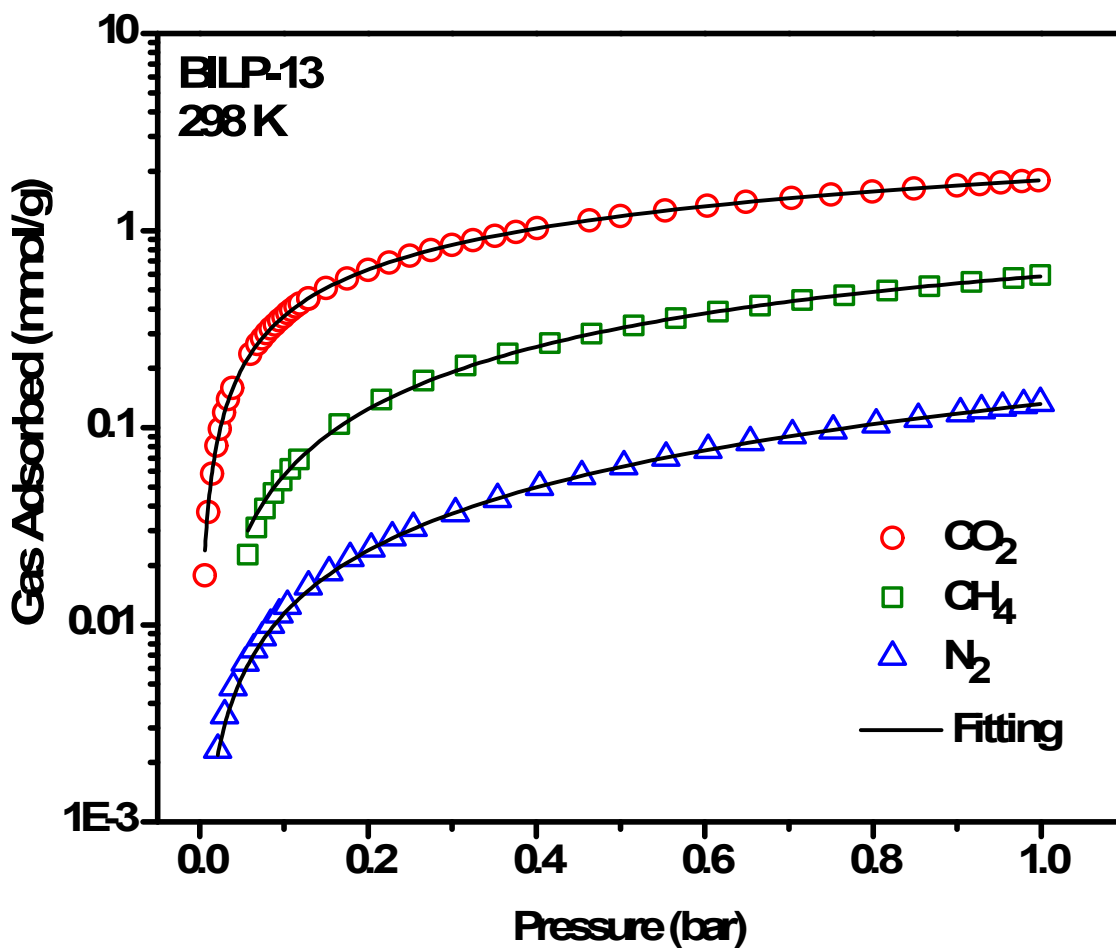

**Table S5.** Langmuir-Freundlich fitting parameters of CO<sub>2</sub> adsorption isotherms in BILP-11, BILP-12 and BILP-13 at 273 K and low pressures (0-1 bar).

|         | $q_{sat,A}$<br>(mmol/g) | $b_A$<br>(bar <sup>-α</sup> ) | $\alpha_A$<br>dimensionless | $q_{sat,B}$<br>(mmol/g) | $b_B$<br>(bar <sup>-α</sup> ) | $\alpha_B$<br>dimensionless | Reduced<br>$\chi^2$ | Adj.<br>$R^2$ |
|---------|-------------------------|-------------------------------|-----------------------------|-------------------------|-------------------------------|-----------------------------|---------------------|---------------|
| BILP-11 | 2.55473                 | 3.92609                       | 0.87342                     | 2.55473                 | 0.71021                       | 1.31074                     | 9.58E-06            | 0.99999       |
| BILP-12 | 11.71108                | 0.47642                       | 0.93745                     | 1.52437                 | 5.59862                       | 0.94541                     | 7.01E-06            | 1             |
| BILP-13 | 2.15718                 | 3.79148                       | 0.91630                     | 2.15718                 | 0.65884                       | 1.40823                     | 8.59E-06            | 0.99999       |

**Figure S26.** Experimental data and corresponding fittings of CO<sub>2</sub> adsorption isotherms in BILP-11, BILP-12 and BILP-13 at 273 K and low pressures (0-1 bar).

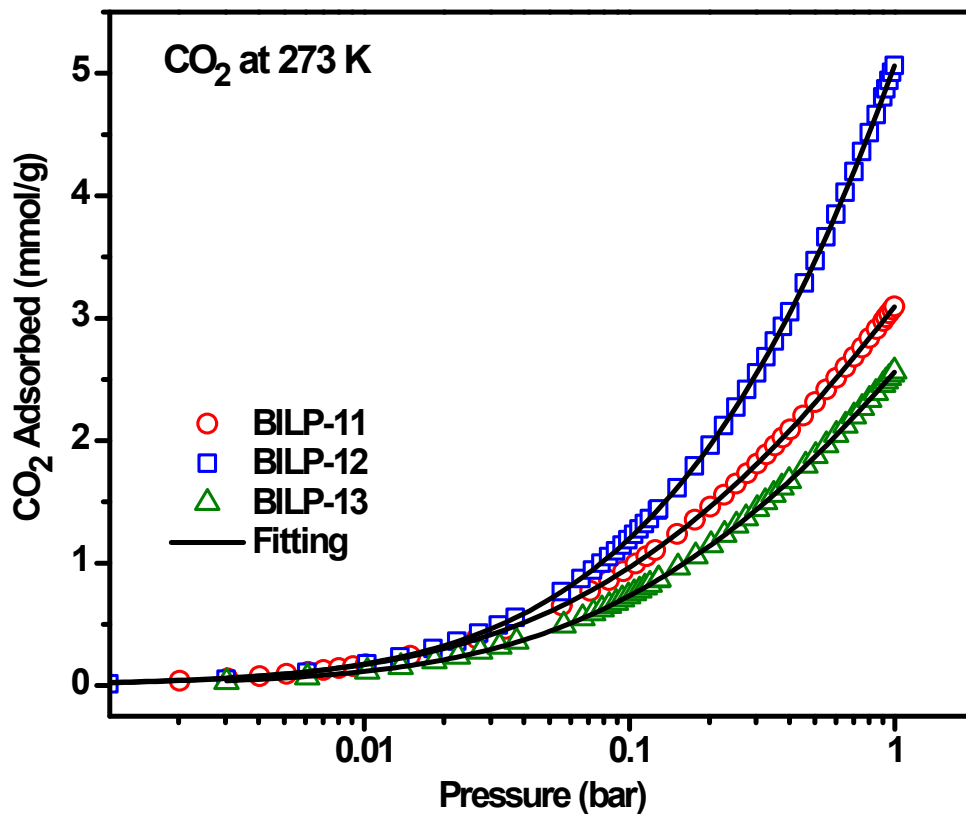

**Table S6.** Langmuir-Freundlich fitting parameters of CH<sub>4</sub> adsorption isotherms in BILP-11, BILP-12 and BILP-13 at 273 K and low pressures (0-1 bar).

|         | $q_{sat,A}$<br>(mmol/g) | $b_A$<br>(bar <sup>-<math>\alpha</math>)</sup> | $\alpha_A$<br>dimensionless | Reduced<br>$\chi^2$ | Adj.<br>$R^2$ |
|---------|-------------------------|------------------------------------------------|-----------------------------|---------------------|---------------|
| BILP-11 | 2.53960                 | 0.61492                                        | 0.98134                     | 5.01E-06            | 0.99995       |
| BILP-12 | 4.87729                 | 0.43123                                        | 0.99132                     | 1.67E-05            | 0.99993       |
| BILP-13 | 1.81128                 | 0.73637                                        | 1.07923                     | 2.21E-05            | 0.99967       |

**Figure S27.** Experimental data and corresponding fittings of CH<sub>4</sub> adsorption isotherms in BILP-11, BILP-12 and BILP-13 at 273 K and low pressures (0-1 bar).

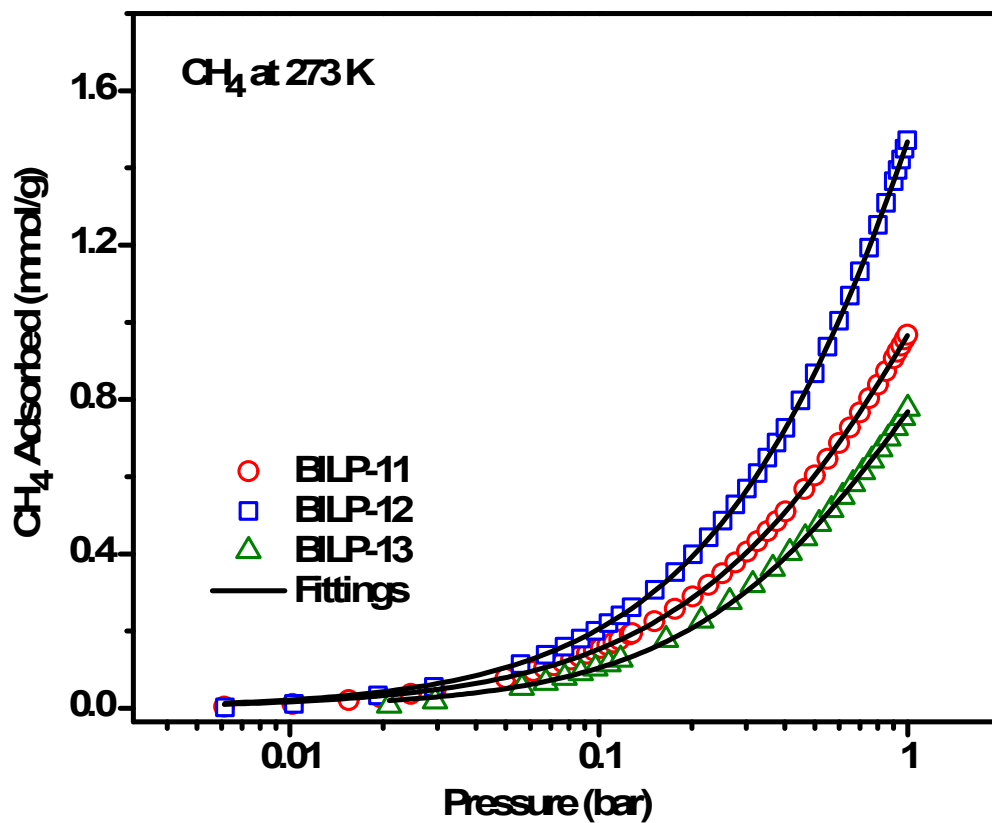

***Section 5: High-Pressure (1-10 bar) Gas Adsorption Measurements and Their Corresponding Isotherm Fittings***

High pressure sorption isotherms were run using a VTI HPVA-100 volumetric analyzer. Ultrahigh purity helium (99.999%) was used to calibrate the free volume in the sample cell before each measurement. High pressure data was collected using ultrahigh purity H<sub>2</sub> (99.999%), CO<sub>2</sub> (99.99%) and CH<sub>4</sub> (99.999%) obtained from Airgas Inc. (Radnor, PA). Free space measurements were performed prior to data collection utilizing ultra-high purity helium to establish the appropriate cold zone compensation factors. Absolute gas uptakes were calculated according to literature methods using NIST Thermochemical Properties of Fluid Systems.<sup>8,9</sup>

**Table S7.** Langmuir-Freundlich fitting parameters of CO<sub>2</sub> and CH<sub>4</sub> total adsorption isotherms in BILP-11 at 298 K and high pressures (1-10 bar).

|                 | $q_{sat,A}$<br>(mmol/g) | $b_A$<br>(bar <sup>-<math>\alpha</math>)</sup> | $\alpha_A$<br>dimensionless | $q_{sat,B}$<br>(mmol/g) | $b_B$<br>(bar <sup>-<math>\alpha</math>)</sup> | $\alpha_B$<br>dimensionless | Reduced<br>$\chi^2$ | Adj.<br>$R^2$ |
|-----------------|-------------------------|------------------------------------------------|-----------------------------|-------------------------|------------------------------------------------|-----------------------------|---------------------|---------------|
| CO <sub>2</sub> | 8.78923                 | 0.23720                                        | 0.58989                     | 1.13471                 | 0.00027                                        | 3.48432                     | 1.02E-04            | 0.99985       |
| CH <sub>4</sub> | 82.17967                | 0.00611                                        | 0.63652                     |                         |                                                |                             | 9.22E-05            | 0.99955       |

**Figure S28.** Experimental data and corresponding fittings of CO<sub>2</sub> and CH<sub>4</sub> total adsorption isotherms in BILP-11 at 298 K and high pressures (1-10 bar).

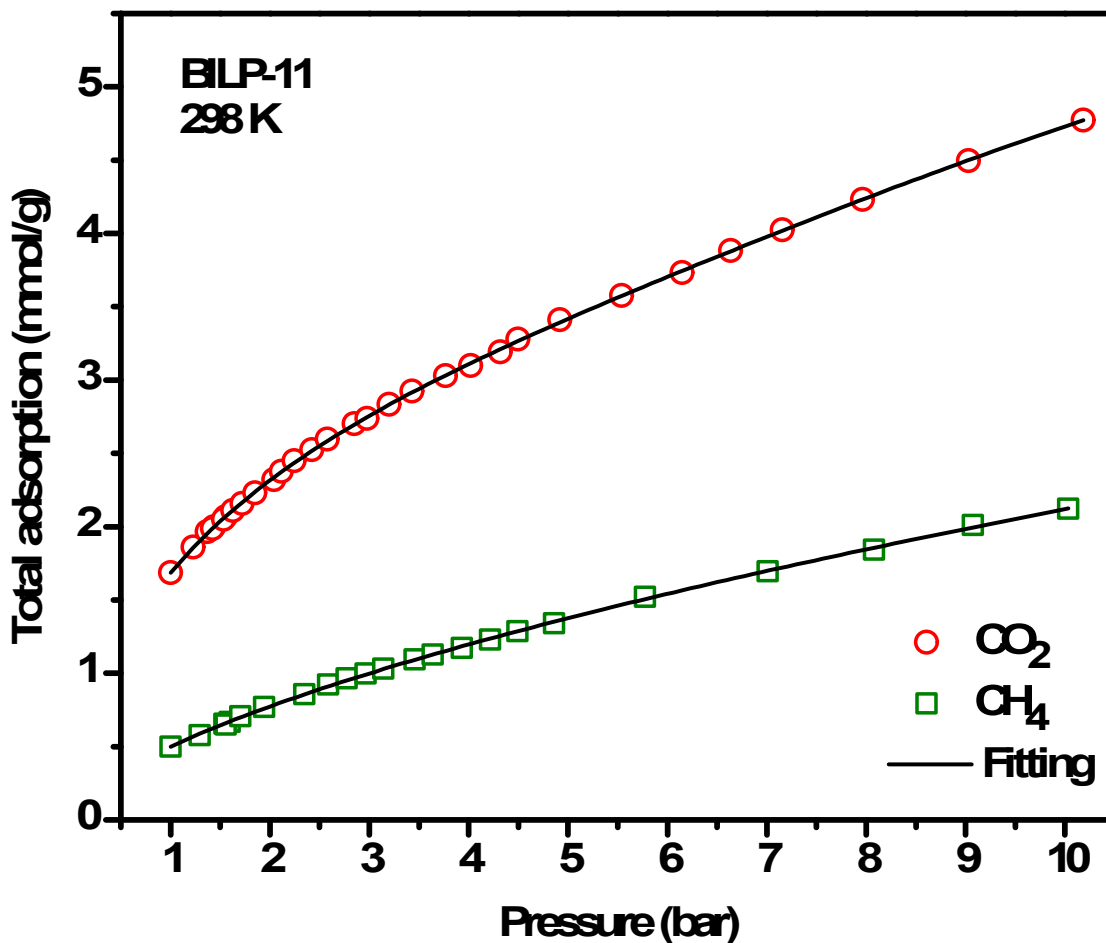

**Table S8.** Langmuir-Freundlich fitting parameters of CO<sub>2</sub> and CH<sub>4</sub> total adsorption isotherms in BILP-12 at 298 K and high pressures (1-10 bar).

|                 | $q_{sat,A}$<br>(mmol/g) | $b_A$<br>(bar <sup>-<math>\alpha</math>)</sup> | $\alpha_A$<br>dimensionless | $q_{sat,B}$<br>(mmol/g) | $b_B$<br>(bar <sup>-<math>\alpha</math>)</sup> | $\alpha_B$<br>dimensionless | Reduced<br>$\chi^2$ | Adj.<br>$R^2$ |
|-----------------|-------------------------|------------------------------------------------|-----------------------------|-------------------------|------------------------------------------------|-----------------------------|---------------------|---------------|
| CO <sub>2</sub> | 0.11207                 | 0.10000                                        | 25.96054                    | 21.42649                | 0.16300                                        | 0.68351                     | 5.84E-04            | 0.99982       |
| CH <sub>4</sub> | 12.02378                | 0.08736                                        | 0.80664                     |                         |                                                |                             | 6.83E-05            | 0.99993       |

**Figure S29.** Experimental data and corresponding fittings of CO<sub>2</sub> and CH<sub>4</sub> total adsorption isotherms in BILP-12 at 298 K and high pressures (1-10 bar).

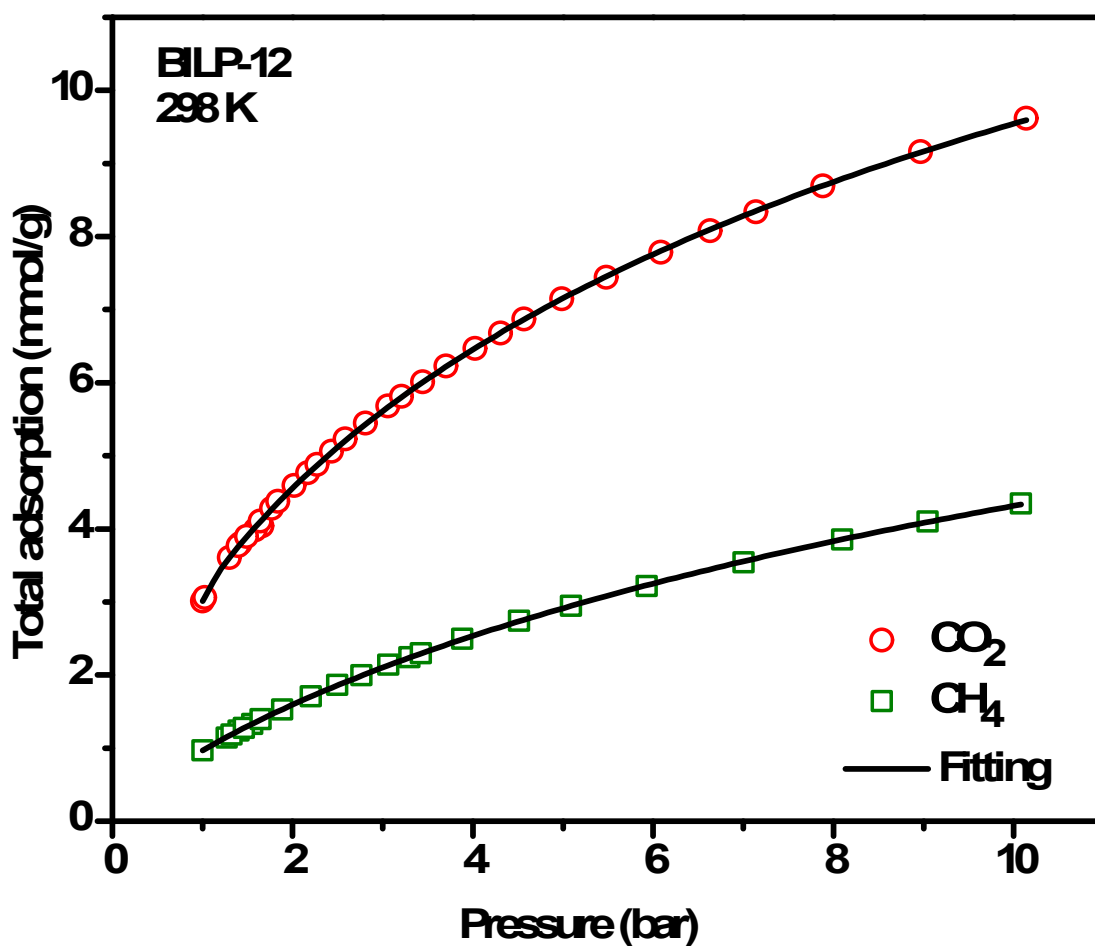



**Table S9.** Langmuir-Freundlich fitting parameters of CO<sub>2</sub> and CH<sub>4</sub> total adsorption isotherms in BILP-13 at 298 K and high pressures (1-10 bar).

|                 | $q_{sat,A}$<br>(mmol/g) | $b_A$<br>(bar <sup>-<math>\alpha</math>)</sup> | $\alpha_A$<br>dimensionless | $q_{sat,B}$<br>(mmol/g) | $b_B$<br>(bar <sup>-<math>\alpha</math>)</sup> | $\alpha_B$<br>dimensionless | Reduced<br>$\chi^2$ | Adj.<br>$R^2$ |
|-----------------|-------------------------|------------------------------------------------|-----------------------------|-------------------------|------------------------------------------------|-----------------------------|---------------------|---------------|
| CO <sub>2</sub> | 4.93109                 | 0.00418                                        | 1.87579                     | 4.93109                 | 0.50425                                        | 0.80475                     | 9.13E-05            | 0.99988       |
| CH <sub>4</sub> | 16.90487                | 0.03233                                        | 0.68995                     |                         |                                                |                             | 3.13E-05            | 0.99987       |

**Figure S30.** Experimental data and corresponding fittings of CO<sub>2</sub> and CH<sub>4</sub> total adsorption isotherms in BILP-13 at 298 K and high pressures (1-10 bar).

### References

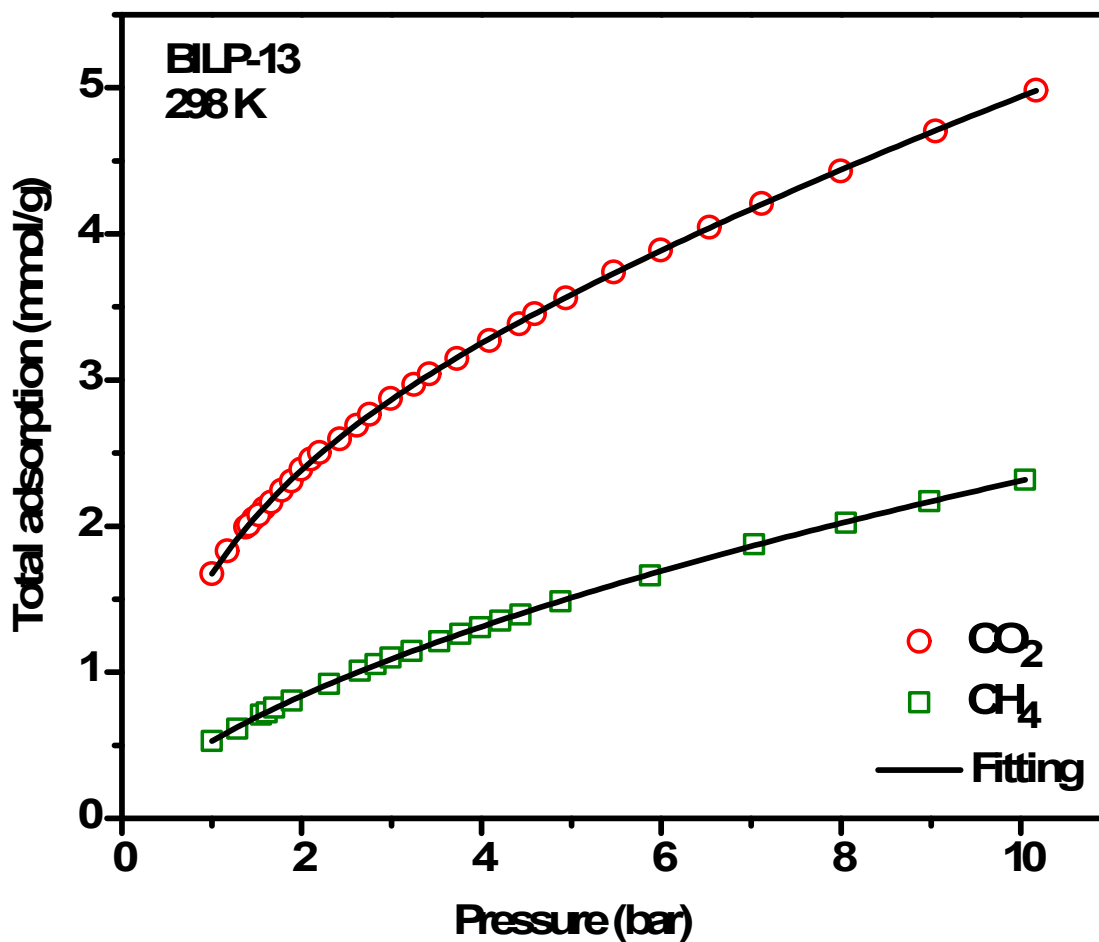

## References

1. M. G. Rabbani and H. M. El-Kaderi, *Chem. Mater.*, 2012, 24, 1511-1517.
2. M. G. Rabbani, T. E. Reich, R. M. Kassab, K. T. Jackson and H. M. El-Kaderi, *Chem. Commun.*, 2012, 48, 1141-1143.
3. M. G. Rabbani and H. M. El-Kaderi, *Chem. Mater.*, 2011, 23, 1650-1653.
4. W. L. Queen, E. D. Bloch, C. M. Brown, M. R. Hudson, J. A. Mason, L. J. Murray, A. J. Ramirez-Cuesta, V. K. Peterson and J. R. Long, *Dalton T*, 2012, 41, 4180-4187.
5. A. L. Myers and J. M. Prausnitz, *Aiche. J.*, 1965, 11, 121-127.
6. C. E. Wilmer, O. K. Farha, Y. S. Bae, J. T. Hupp and R. Q. Snurr, *Energ. Environ. Sci.*, 2012, 5, 9849-9856.
7. Y. S. Bae and R. Q. Snurr, *Angew. Chem., Int. Edit.*, 2011, 50, 11586-11596.
8. H. Furukawa, M. A. Miller and O. M. Yaghi, *J. Mater. Chem.*, 2007, 17, 3197-3204.
9. N. C. W. T. P. o. F. S. <http://webbook.nist.gov/chemistry/fluid/>.
